# Supplementary material for: CAR T cell manufacturing from naive/stem memory T lymphocytes enhances antitumor responses while curtailing cytokine release syndrome
Source: J Clin Invest. 2022 Jun 15;132(12):e150807. doi: 10.1172/JCI150807 (PMC9197529; doi:10.1172/JCI150807)
Supplement: Supplemental data [file jci-132-150807-s121.pdf]

## Supplementary Material

Figure S1. CAR T<sub>N/SCM</sub> are less differentiated and display a reduced exhausted-like status *in vitro*.

Figure S2. CAR T<sub>N/SCM</sub> expand more in HuSGM3 mice without causing detrimental side effects.

Figure S3. CAR T<sub>N/SCM</sub> and CAR T<sub>BULK</sub> are effective *in vivo* and equally represented in the meta-cluster analysis.

Figure S4. CAR T<sub>N/SCM</sub> are less prone to cause multifocal brain hemorrhages *in vivo*.

Figure S5. CAR T<sub>N/SCM</sub> BBz display lower activation *in vitro* and expand more *in vivo*.

Figure S6. CAR T<sub>N/SCM</sub> activate less upon leukemia encounter *in vitro*.

Figure S7. Milder activation status characterizes CAR T<sub>N/SCM</sub> in the presence of myeloid cells.

Figure S8. CAR T<sub>N/SCM</sub> better calibrate monocyte-like activation and cytokine production.

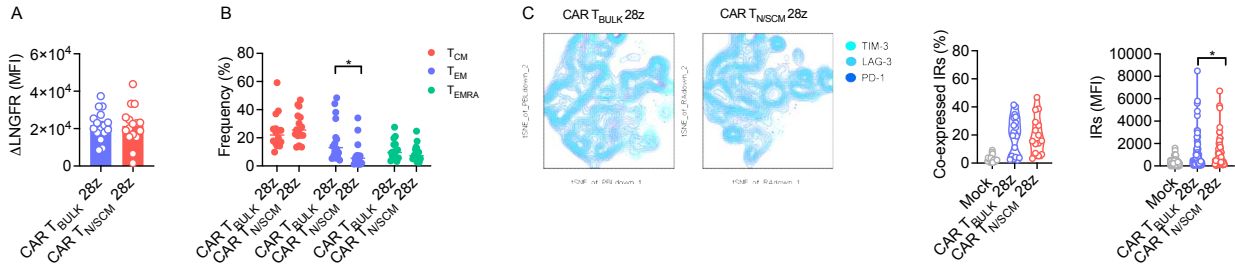

23

24 **Figure S1. CAR T<sub>N/SCM</sub> are less differentiated and display a reduced exhausted-like status *in***  
 25 ***vitro***

26 **A)** ΔLNGFR marker expression reported as MFI at the end of culture protocol (n=16). **B)** Frequency  
 27 of central memory, effector memory and terminally differentiated T-cell subsets at the end of culture  
 28 (n=16). **C)** Left plots and panel: Tsne representation and percentage of T cells co-expressing TIM-3,  
 29 LAG-3 and PD-1 inhibitory receptor (IRs) after co-culture with CD19+ targets (NALM-6 and ALL-  
 30 CM cell lines; n=19 for CAR T<sub>BULK</sub>, n=15 for CAR T<sub>N/SCM</sub>). Right panel: IRs mean fluorescence  
 31 intensity (MFI) values (n=11 donors). Data are represented as the result of mean ±SEM together with  
 32 overlapping scattered values and box and violin plots. Results of two-way ANOVA (B) and paired t-  
 33 test (A, C) are reported when statistically significant (\*p<0.05).

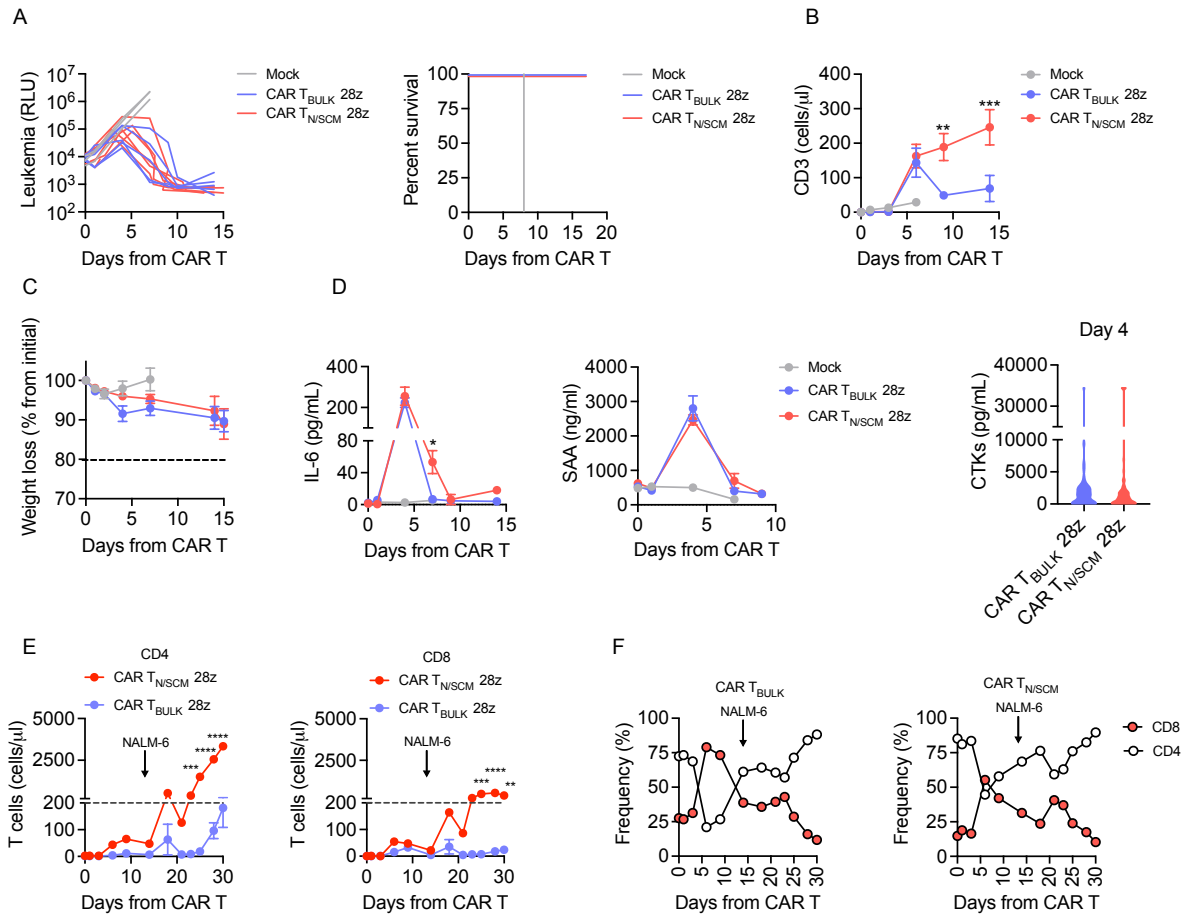

**Figure S2. CAR T<sub>N/SCM</sub> expand more in HuSGM3 mice without causing detrimental side effects**

HuSGM3 mice were infused with Lucia<sup>+</sup>/NGFR<sup>+</sup>/NALM-6 cells and treated with  $3 \times 10^6$  CAR T<sub>N/SCM</sub> (n=6), CAR T<sub>BULK</sub> (n=5) or Mock control (n=3) and analyzed for antitumor activity and toxic manifestations. **A)** Left: Bioluminescence detection of tumor growth after treatment. Data are represented as single interspersed lines representing individual treated mice. Right: Kaplan-Meier survival analysis of mice. **B)** T-cell expansion in the peripheral blood of mice. **C, D)** Evaluation of signs and symptoms typical of CRS development in HuSGM3 leukemia bearing mice, represented by weight loss (**C**) and serum levels of IL-6 (**D**, left), murine serum amyloid A (SAA, **D** middle) and other pro-inflammatory cytokines, namely IL-10, TNF- $\alpha$ , IL-1 $\alpha$ , IFN- $\gamma$ , MIP-1 $\alpha$ , IP-10, MCP-1, IL-8, IL-2 and again IL-6 (**D**, right). **E)** CD4 (left) and CD8 (right) T-cell expansion within CAR T<sub>BULK</sub> (n=17) and CAR T<sub>N/SCM</sub> (n=17) in the peripheral blood of NALM-6 bearing mice measured at

47 different time points after treatment. **F)** CD4 and CD8 frequency in CAR T<sub>BULK</sub> (left) and CAR T<sub>N/SCM</sub>  
48 (right) measured in the peripheral blood of NALM-6 bearing mice at different time points after  
49 treatment. Data are represented as the result of mean  $\pm$ SEM and box and violin plots. Results of  
50 unpaired t-test (D, right panel) and two-way ANOVA (A-F) are reported when statistically significant  
51 (\*p<0.05; \*\*p<0,01; \*\*\*p<0,001).

52

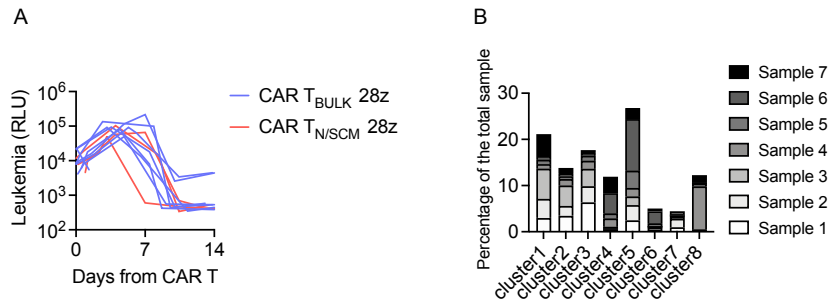

**Figure S3. CAR T<sub>N/SCM</sub> and CAR T<sub>BULK</sub> are effective *in vivo* and equally represented in the meta-cluster analysis**

**A)** Bioluminescence detection of Lucia+/NGFR+/NALM-6 systemic growth in HuSGM3 mice after treatment with  $1 \times 10^6$  CAR T<sub>N/SCM</sub>, CAR T<sub>BULK</sub> or Mock control. Data are represented as single interspersed lines representing individual treated mice (n=7 for CAR T<sub>BULK</sub> and n=3 for CAR T<sub>N/SCM</sub>).

**B)** Distribution of each sample in the relevant clusters after BH-SNE analysis.

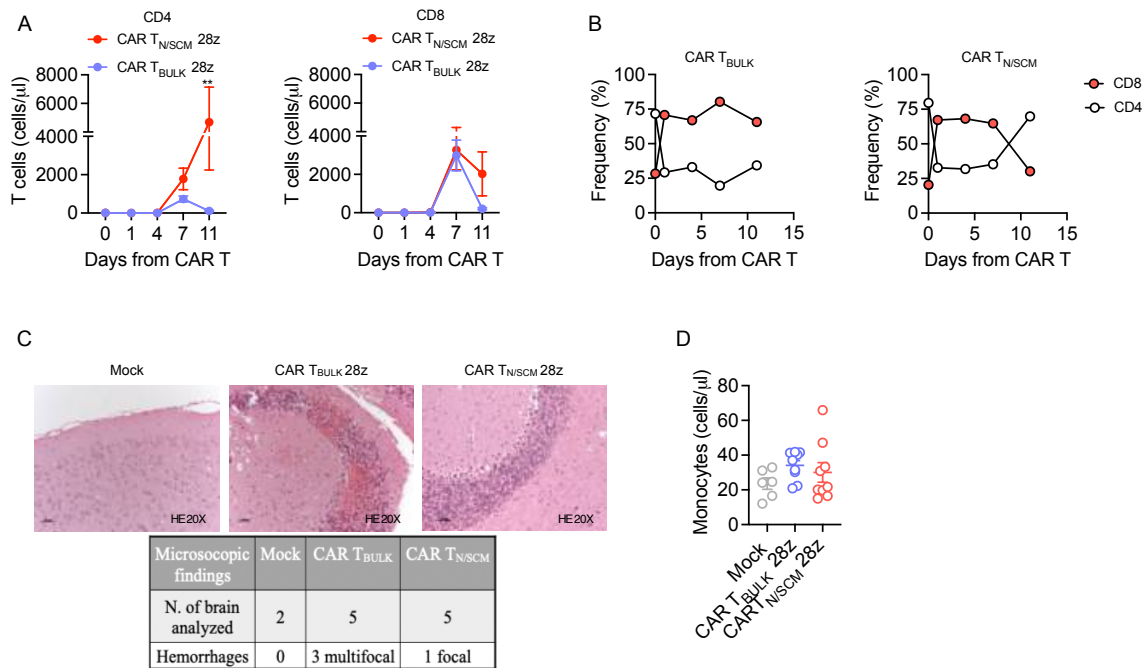

**Figure S4. CAR T<sub>N/SCM</sub> are less prone to cause multifocal brain hemorrhages *in vivo***

**A)** CD4 (left) and CD8 (right) T-cell expansion within CAR T<sub>BULK</sub> (n=6) and CAR T<sub>N/SCM</sub> (n=6) in the peripheral blood of NALM-6 bearing mice measured at different time points after treatment. **B)** CD4 and CD8 frequency in CAR T<sub>BULK</sub> (left) and CAR T<sub>N/SCM</sub> (right) measured in the peripheral blood of NALM-6 bearing mice at different time points after treatment. **C)** Hematoxylin and eosin-stained section of brains belonging to representative Mock control, CAR T<sub>BULK</sub> and CAR T<sub>N/SCM</sub> treated mice (20x magnification; bar:50 micron) with relative incidence table of microscopic findings recorded in collected brains belonging to HuSGM3 leukemia-bearing mice treated with CD28-costimulated CAR T<sub>N/SCM</sub>, CAR T<sub>BULK</sub> and Mock control. **D)** Monocyte absolute number immediately before CAR T-cell infusion in HuSGM3 leukemia bearing mice (n=9 for CAR T<sub>BULK</sub>, n=9 for CAR T<sub>N/SCM</sub>, n=6 for Mock).

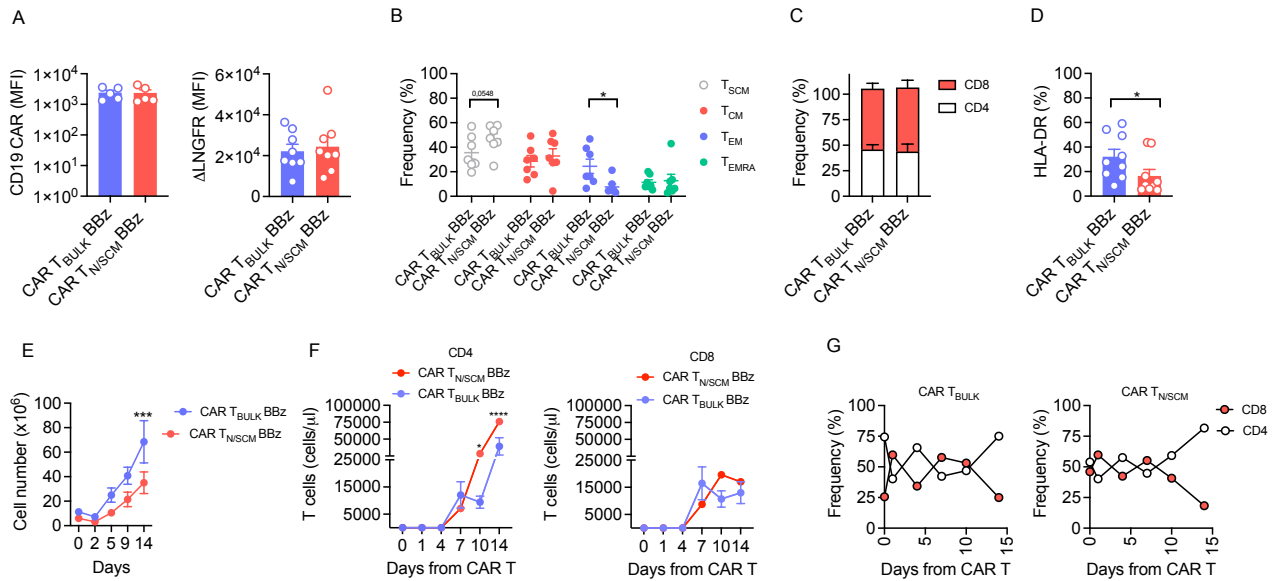

**Figure S5. CAR T<sub>N/SCM</sub> BBz display lower activation *in vitro* and expand more *in vivo***

**A)** CD19.CAR scFv (n=5, left) and  $\Delta$ LINGFR marker gene (n=8, right) expressed as MFI at the end of culture protocol. **B)** Memory phenotype at the end of T-cell manufacturing (n=7 donors). **C)** CD4/CD8 ratio (n=9 donors) and **D)** HLA-DR expression at the end of culture (n=9 donors). **E)** Fold expansion at different time points during culture (n=7). **F)** CD4 (left) and CD8 (right) T-cell expansion of CAR T<sub>BULK</sub> (n=13) and CAR T<sub>N/SCM</sub> (n=12) in the peripheral blood of NALM-6 bearing mice measured at different time points after treatment. **G)** CD4 and CD8 frequency of CAR T<sub>BULK</sub> (left) and CAR T<sub>N/SCM</sub> (right) measured in the peripheral blood of NALM-6 bearing mice at different time points after treatment. Data are represented as the result of mean  $\pm$ SEM together with overlapping scattered values. Results of paired t-tests (C) and two-way ANOVA (A, B, D) are reported when statistically significant (\*p<0,05; \*\*\*p<0,001).

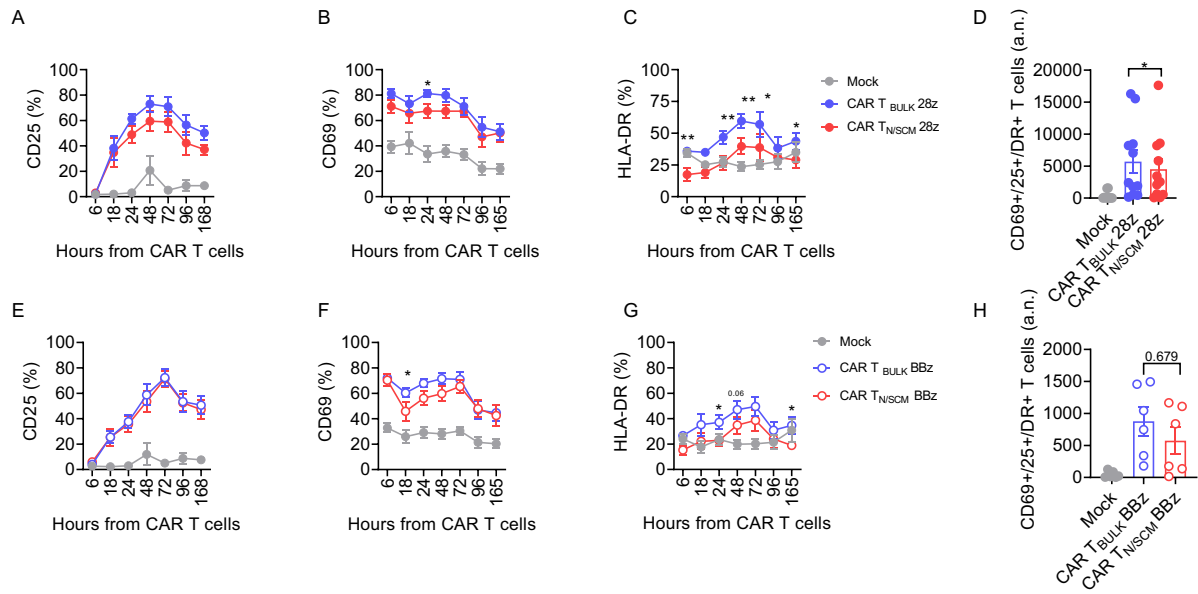

**Figure S6. CAR T<sub>N/SCM</sub> activate less upon leukemia encounter *in vitro***

Activation kinetic of CAR T cells at different time points after stimulation with NALM-6 cells measured as upregulation of **A, E**) CD25 activation marker, **B, F**) CD69 activation marker and **C, G**) HLA-DR activation marker expression (CAR T<sub>BULK</sub>/CAR T<sub>N/SCM</sub> 28z n=11; CAR T<sub>BULK</sub>/CAR T<sub>N/SCM</sub> BBz n=11). **D, H**) Number of T cells co-expressing CD25/CD69/HLA-DR activation markers 48 hours after co-culture with tumor cells (n=11). Data are represented as the result of mean  $\pm$ SEM together with overlapping scattered values and results of paired t-test is reported when statistically significant (\*p<0,05).

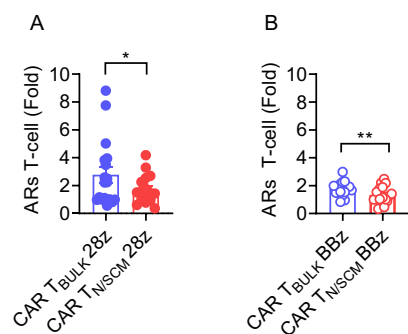

101

102

103 **Figure S7. Milder activation status characterizes CAR T<sub>N/SCM</sub> in the presence of myeloid cells**

104 Activation receptors (ARs) upregulation on **A)** CD28 and **B)** 4-1BB co-stimulated CAR T cells

105 (CD54/CD86/HLA-DR/CD25) expressed as fold 24 hours after plating a tripartite coculture

106 comprising NALM-6, CAR T cells and autologous monocyte (CAR T<sub>BULK</sub>/CAR T<sub>N/SCM</sub> 28z n=5;

107 CAR T<sub>BULK</sub>/CAR T<sub>N/SCM</sub> BBz n=4).

108

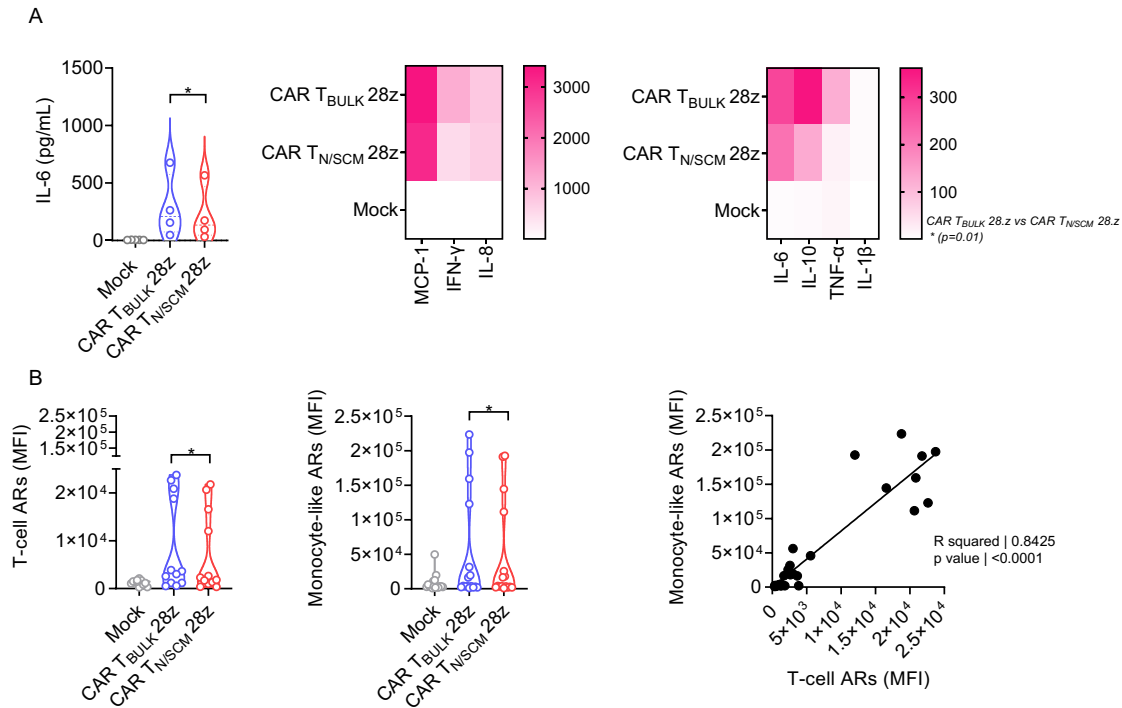

109

# 110 **Figure S8. CAR T<sub>N/SCM</sub> better calibrate monocyte-like activation and cytokine production**

111 CAR T<sub>BULK</sub> and CAR T<sub>N/SCM</sub> were cultured with NALM-6 and THP-1 cells. **A**) IL-6 production (left

112 panel) and heat-map visualization of cytokine release (right panel) 24 hours after plating (n=4). **B**)

113 Activation receptors (ARs) upregulation on T cells (CD54/CD86/HLA-DR, left) and THP-1 cells

114 (CD54/CD86/CD163/HLA-DR, middle) expressed as MFI 24 hours after plating, together with

115 correlation analysis between T-cell and THP-1 activation states (considering CD54/CD86/HLA-DR,

116 right; n=4).
